# Supplementary material for: Effect of cellulase family and structure on modification of wood fibres at high consistency
Source: Springer Nature journal article supplement (doi:10.1007/s10570-019-02424-x), 2019-04-13
Supplement: MOESM1 [file 16654688]

Supplementary material


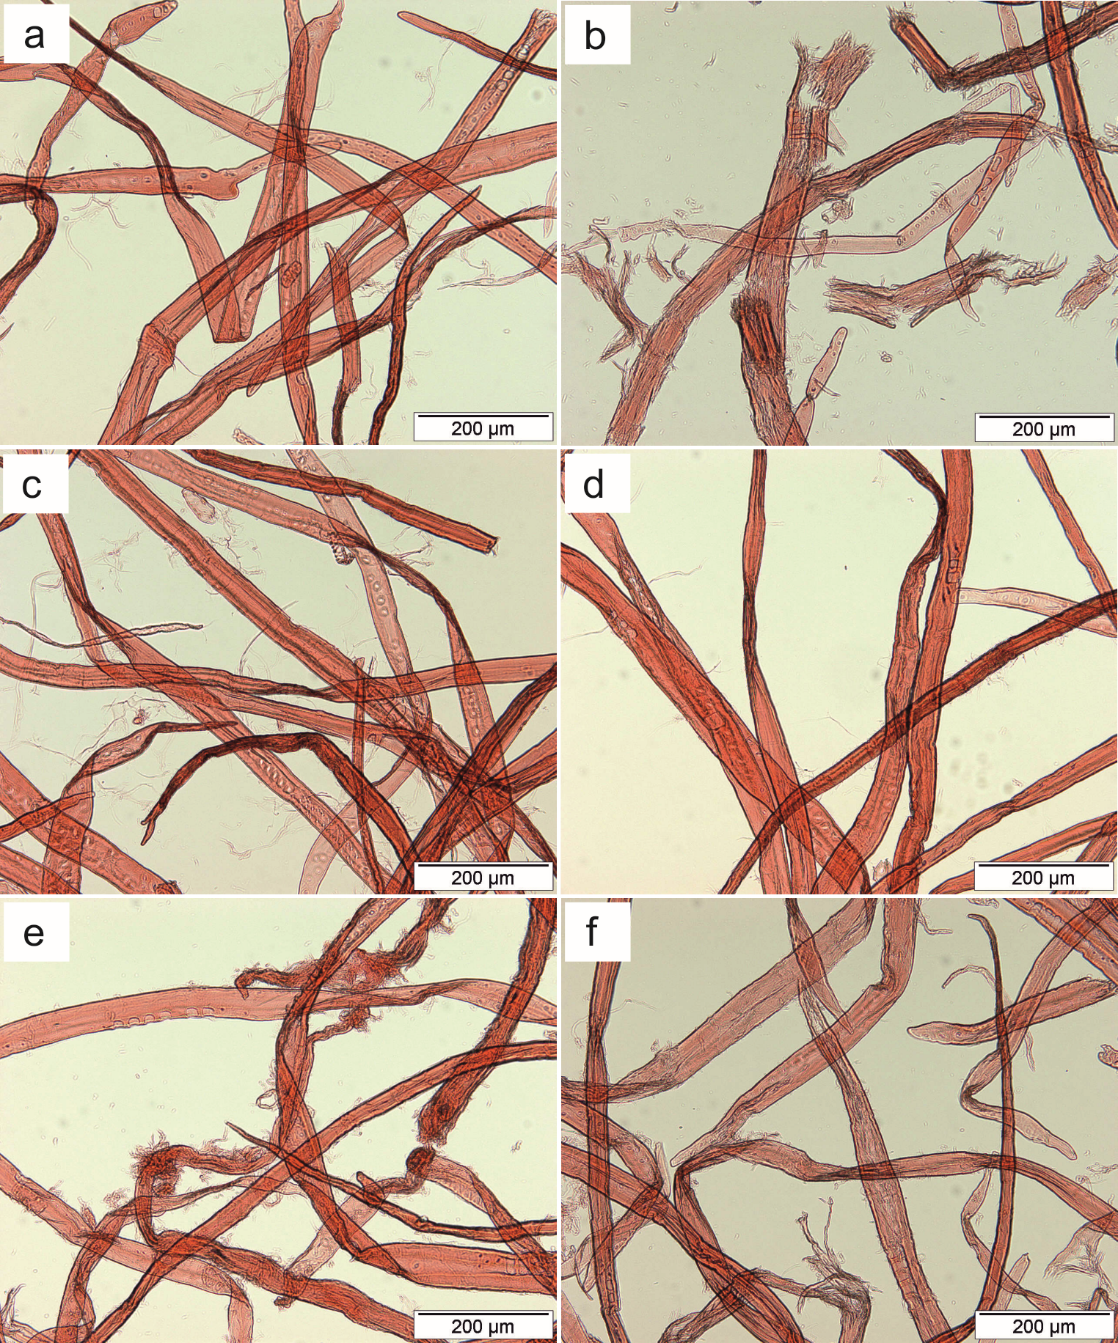


S1 Light microscopy images of fibres stained with Congo Red after treatment at a) high dry matter (20% w/w) without enzyme, b) high dry matter with GH45+CBM, c) low dry matter (1% w/w) without enzyme, d) low dry matter with GH45+CBM, e) high dry matter with GH7+CBM and f) high dry matter with GH5+CBM. Treatments of bleached softwood kraft pulp were carried out for 2h at 50°C at pH 5 using an enzyme dosage of 0.2 mg protein/g of dry pulp.





S2 Analysis of accessible OH goups in pulp with deuterium exchange. The pulp samples were treated at high dry matter content (20% w/w). Treatments of bleached softwood kraft pulp were carried out for 2h at 50°C at pH 5 using an enzyme dosage of 0.2 mg protein/g of dry pulp. Reference treatment was carried out without enzyme.

S3 Dissolution time of enzyme treated pulp samples plotted as a function of sample viscosity. Data represented from Fig 6.

S4 Video showing fibre dissolution in 0.2M cupriethylenediamine (CED) monitored by light microscope. The video is speeded-up 10-times. The panel on the left shows dissolution of three fibres from the reference sample treated at high dry matter content (20% w/w) without enzymes. For comparison, the panel on the right shows dissolution of three fibres from the enzyme treated samples (GH45, GH45+CBM and GH7+CBM). Enzyme treatments of bleached softwood kraft fibres were carried out at high dry matter content (20% w/w) for 2h at 50°C at pH 5 using an enzyme dosage of 0.2 mg protein/g of dry pulp.


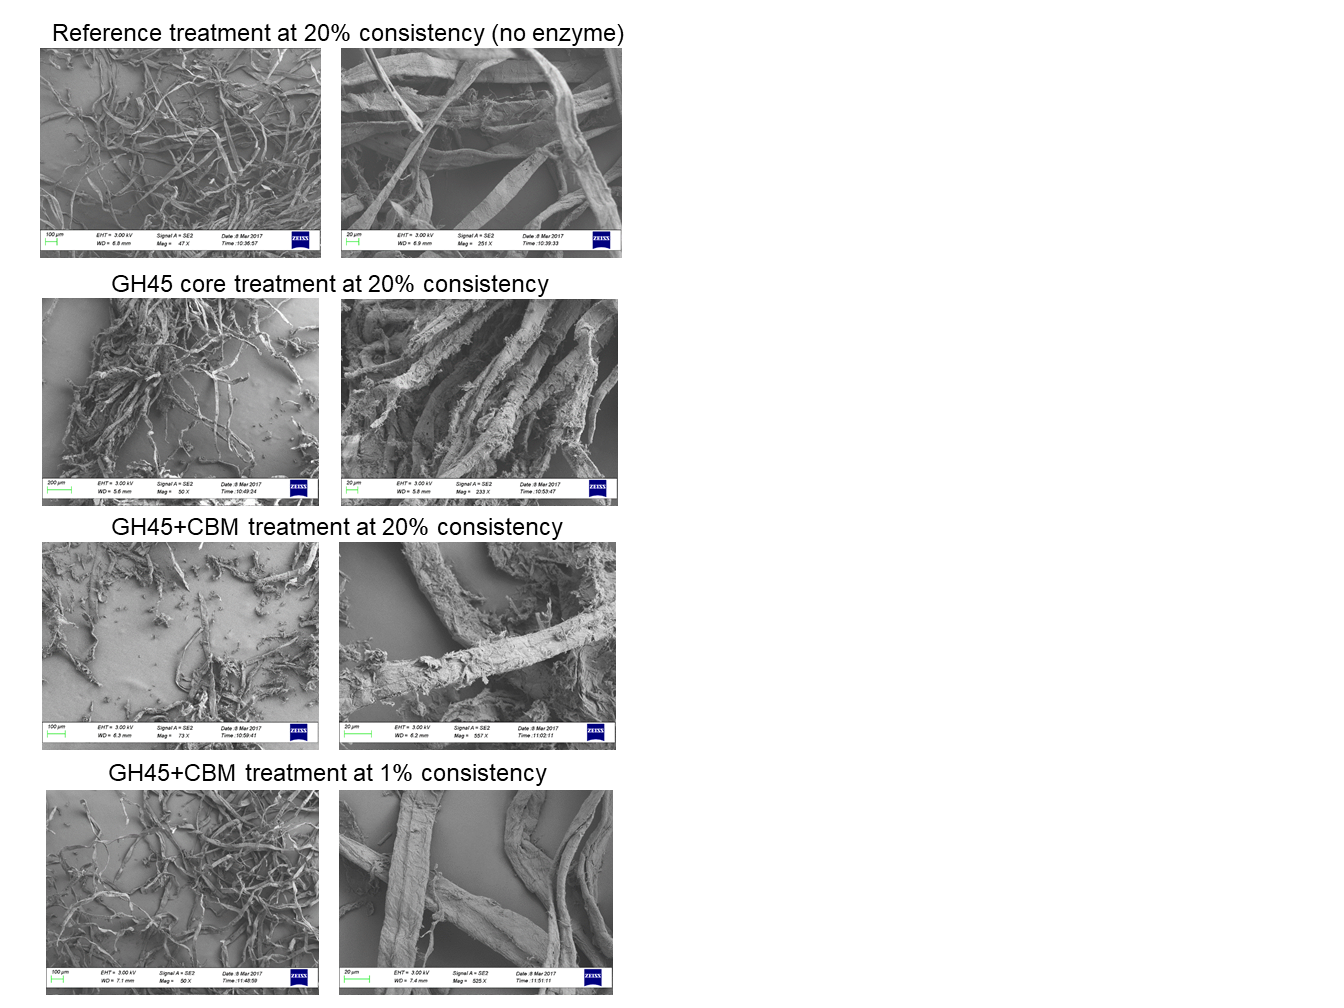


S5 Scanning electron micrographs of fibres treated without enzyme at 20% (reference treatment), with GH45 core at 20%, with GH45+CBM at 20% and with GH45+CBM at 1%. The high consistency treatments with GH45 with and without a CBM resulted in fibers with highly similar “rough” appearance. When the pulp was treated at low consistency (1%) with GH45+CBM the fibre surfaces appeared smooth and similar to the reference treatment without enzyme.
